# Supplementary material
Source: PubMed Central journal article supplement (PMC2998636)
Supplement: mmc1.pdf [file mmc1.pdf]

**Supporting Material**

**The Met268Pro mutation of mouse TRPA1 changes the effect of caffeine from activation to suppression**

Katsuhiko Nagatomo, Hiroshi Ishii, Tomomi Yamamoto, Koichi Nakajo and Yoshihiro Kubo

**Supplementary Table 1 Mean  $\pm$  SEM values of the current amplitudes ( $\mu$ A) of the experiments in the Supplementary experiments.**

**A** (current amplitude at +100 mV)

| <i>Suppl. Fig. 2A, B</i> | mTRPA1 WT       | hTRPA1 WT       |
|--------------------------|-----------------|-----------------|
| 20 mM sucrose            | 0.01 $\pm$ 0.01 | 0.05 $\pm$ 0.03 |
| 10 mM caffeine           | 2.95 $\pm$ 0.64 | -               |
| 100 $\mu$ M AITC         | -               | 22.5 $\pm$ 2.9  |
| n value                  | 4               | 4               |

**B** (current amplitude at +60 mV)

| <i>Cys site mutants</i> | mTRPA1 WT       | C622S           |
|-------------------------|-----------------|-----------------|
| 5 mM caffeine           | 1.02 $\pm$ 0.43 | 2.64 $\pm$ 1.34 |
| n value                 | 3               | 5               |

**C** (current amplitude at +100 mV)

| <i>Ca<sup>2+</sup><sub>i</sub> site mutants</i> | mTRPA1 WT       | D469A           |
|-------------------------------------------------|-----------------|-----------------|
| 5 mM caffeine                                   | 1.62 $\pm$ 0.56 | 8.12 $\pm$ 1.40 |
| n value                                         | 2               | 6               |

**D** (current amplitude at +60 mV)

| <i>Ca<sup>2+</sup><sub>i</sub> site mutants</i> | mTRPA1 WT       | L475A           |
|-------------------------------------------------|-----------------|-----------------|
| 5 mM caffeine                                   | 1.54 $\pm$ 0.25 | 0.86 $\pm$ 0.14 |
| n value                                         | 10              | 12              |

**E** (current amplitude at +60 mV)

| <i>Tyr site mutants</i> | mTRPA1 WT       | Y728A                                          | Y788A           |
|-------------------------|-----------------|------------------------------------------------|-----------------|
| 5 mM caffeine           | 1.99 $\pm$ 0.25 | 0.026 $\pm$ 0.003<br>(clearer resp after AITC) | 0.38 $\pm$ 0.17 |

|         |   |   |   |
|---------|---|---|---|
| n value | 3 | 2 | 3 |
|---------|---|---|---|

**F** (current amplitude at +60 mV)

| <i>Tyr site mutants</i> | mTRPA1 WT | Y815A       | Y845A       | Y852A       |
|-------------------------|-----------|-------------|-------------|-------------|
| 5 mM caffeine           | 0.96      | 0.15 ± 0.05 | 0.21 ± 0.03 | 0.32 ± 0.16 |
| n value                 | 1         | 2           | 2           | 2           |

**G** (current amplitude at +60 mV)

| <i>Suppl. Fig. 4B</i> | mTRPA1 WT   | Y1009A      | Y1009L      |
|-----------------------|-------------|-------------|-------------|
| 5 mM caffeine         | 2.42 ± 0.45 | 12.1 ± 2.14 | 11.4 ± 2.70 |
| 100µM AITC            | 2.56 ± 1.12 | 8.11 ± 1.14 | 7.34 ± 2.09 |
| n value               | 5           | 7           | 6           |

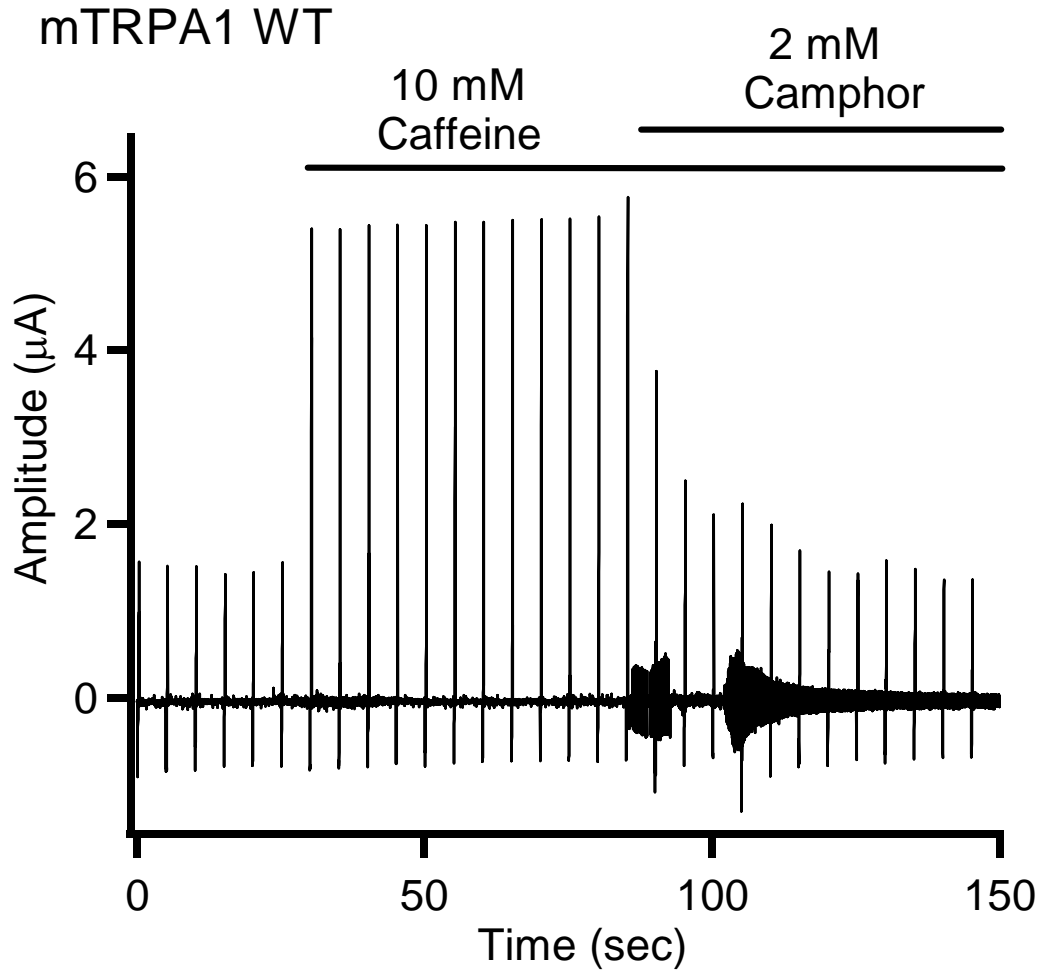

**Supplementary Figure 1**

**Sensitivity of the caffeine-evoked current to the block by camphor, a TRPA1 channel blocker**

Details of the recordings are the same as in Figure 3. 10 mM caffeine was applied first by pipetting one-fifth volume (40  $\mu\text{l}$ ) of 5 times concentrated solution to the bath of 200  $\mu\text{l}$ . Then 3 ml of bath solution containing 10 mM caffeine and 2 mM camphor was applied by pipetting with a continuous suction of the overflowed solution by a negative pressure to achieve complete solution exchange.

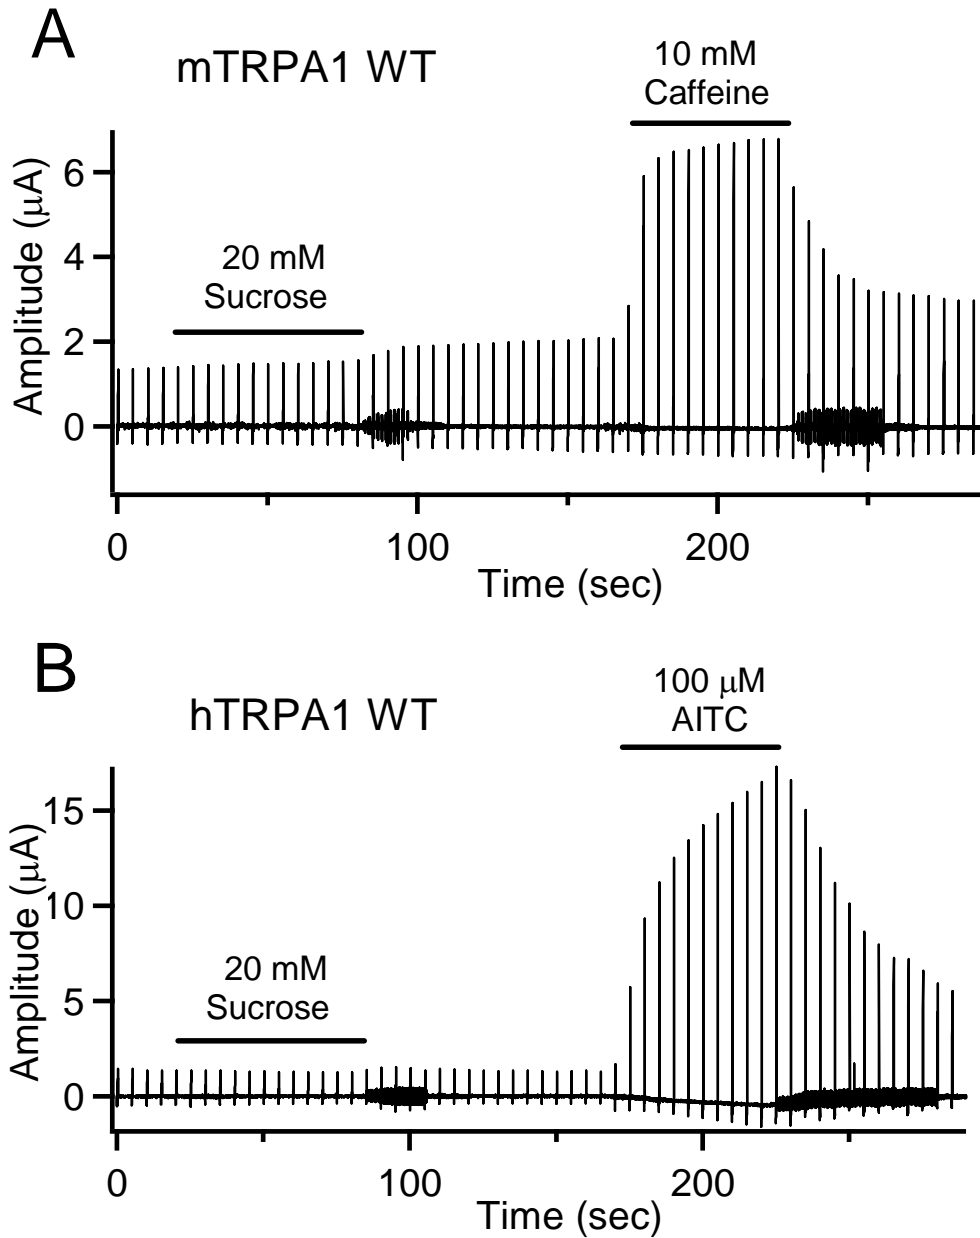

### Supplementary Figure 2

#### Responses of mTRPA1 and hTRPA1 to 20 mM sucrose

Details of the recordings are the same as in Figure 3. 20 mM sucrose was applied first by pipetting one-fifth volume (40  $\mu\text{l}$ ) of 5 times concentrated solution to the bath of 200  $\mu\text{l}$ . After washing out the sucrose containing bath solution by perfusion, positive control stimuli (10 mM caffeine in A and 100  $\mu\text{M}$  AITC in B) were applied. The values are shown in Supplementary Table 1A.

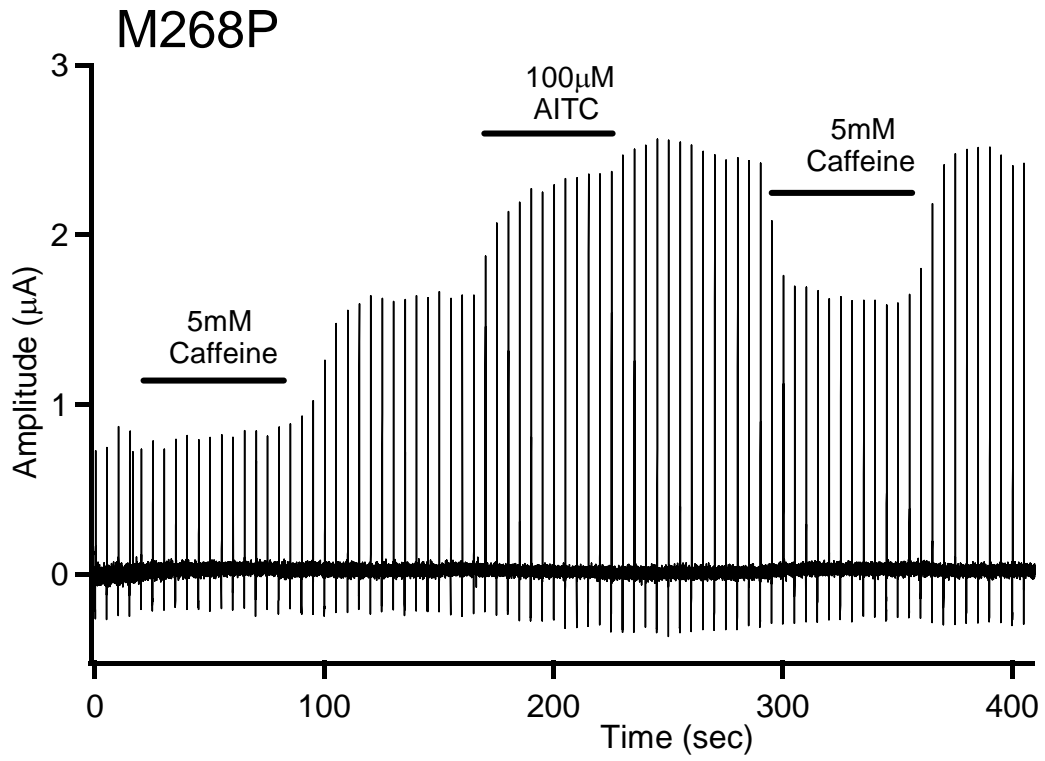

**Supplementary Figure 3**

**Confirmation of AITC response of Met268Pro**

Details of the experiments are the same as in Figure 3.

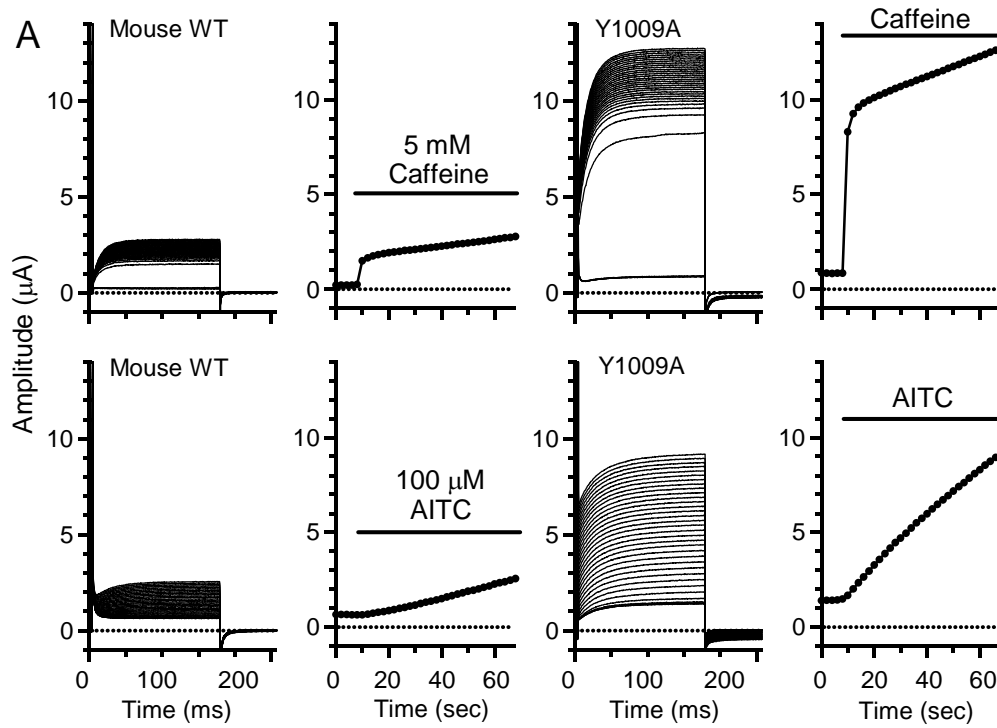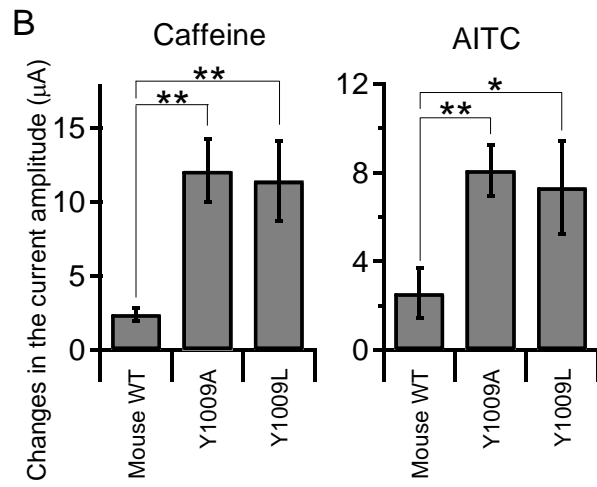

**Supplementary Figure 4**

**Responses of Tyr1009Ala and Tyr1009Leu mutants to caffeine and AITC**

(A) Current recordings of mTRPA1 WT (left) and Tyr1009Ala (right) were obtained by applying depolarizing step pulses repeatedly every 2s before and after application of agonists. The time lapse changes of the peak current amplitude at the depolarized state were also shown.

(B) Plots of mean and standard error of the changes in the current amplitude after 60s. The values are shown in Supplementary Table 1G.

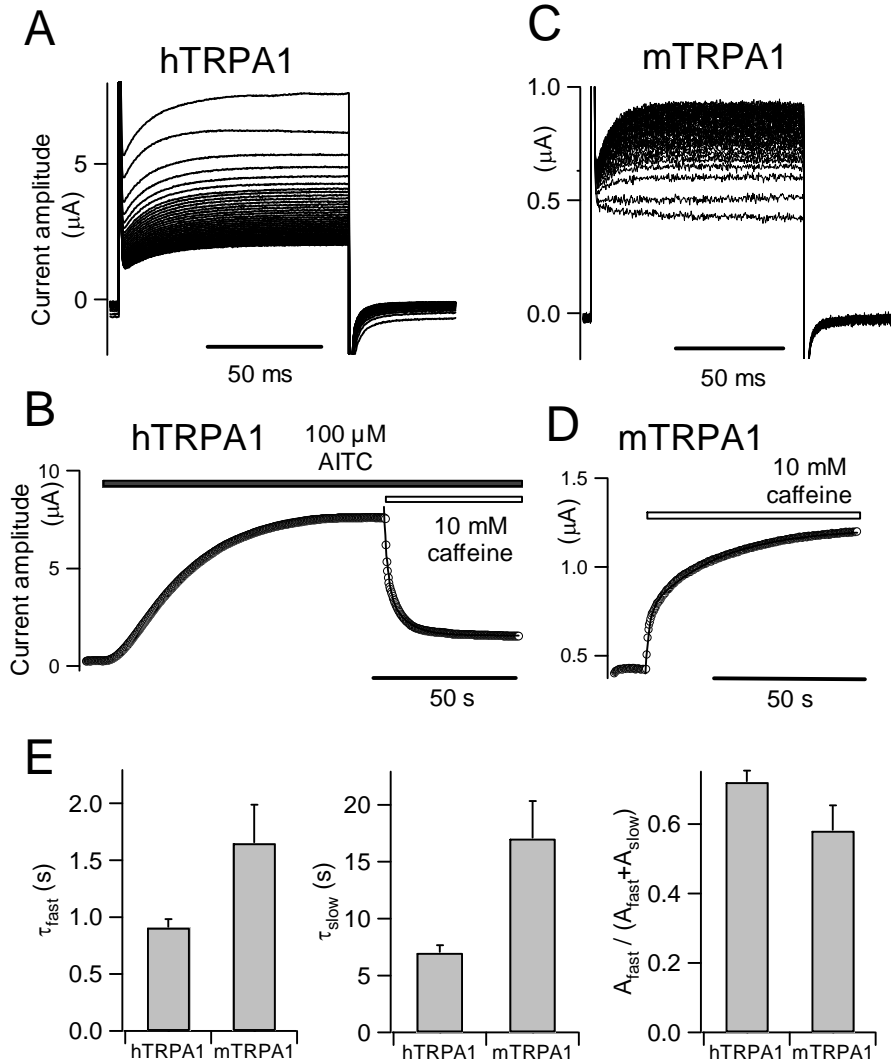

### Supplementary Figure 5

#### Comparison of the time course of inhibition of hTRPA1 current and activation of mTRPA1 current by caffeine

(A, C) Representative current traces of hTRPA1 during the course of inhibition by 10 mM caffeine (A) and mTRPA1 during the course of activation by 10 mM caffeine (C). Depolarizing pulses for 100 ms at +60 mV were applied to oocytes every 250ms from the holding potential of -20 mV. In hTRPA1, the most upper trace is the current activated by 100  $\mu\text{M}$  AITC just before the caffeine application and the current gradually decreased after the caffeine application. In mTRPA1, the lowest current trace is the current just before the caffeine application and the current gradually increased after the caffeine application. (B, D) The time course of the change of current amplitude induced by caffeine. Data were taken from the same oocyte of (A, C). Caffeine-induced changes were fitted with a double exponential function (black curves). (E) Time constants of caffeine-induced changes deduced from the double exponential fit. Faster time constants ( $\tau_{\text{fast}}$ , left), slower time constants ( $\tau_{\text{slow}}$ , middle) and the fraction of faster component ( $A_{\text{fast}} / (A_{\text{fast}} + A_{\text{slow}})$ , right). Bars indicate means  $\pm$  SEM (n = 10 for each).
